# Supplementary material for: Photoluminescent poly(4-vinylpyridine)-based ionic liquids coded with l- and d-histidine: a supramolecular self-assembly leading to the formation of red-shifted photoluminescent helical aggregates
Source: Royal Society of Chemistry journal article supplement (doi:10.1039/c9py00181f), 2019-01-01
Supplement: c9py00181f1.pdf [file c9py00181f1.pdf]

## **Supporting Information**

### **Photoluminescent Poly(4-vinylpyridine) based Ionic liquids Coded with *L*- and *D*-Histidine: Supramolecular Self-Assembly leading to Red-shifted Photoluminescent Helical Aggregates**

**Puhup Puneet,<sup>\*a</sup> Andriy Horechyy,<sup>b</sup> Rajiv K Srivastava,<sup>a</sup> Bhanu Nandan<sup>\*a</sup> and  
Michiya Fujiki,<sup>c</sup>**

<sup>a</sup> *Department of Textile Technology, Indian Institute of Technology Delhi, New Delhi, India. E-mail: rupakagain2008@gmail.com, nandan@textile.iitd.ac.in*

<sup>b</sup> *Department of Nanostructured Materials, Leibniz Institute for Polymer Research, Hohe Strasse 6, Dresden, Germany*

<sup>c</sup> *Division of Materials Science, Nara Advanced Institute of Technology, Nara, Japan.*

**1. POM images of self-assembled thick fibers by slow evaporation.**

Polarized optical microscope (POM) images of self-assembled thick fiber showed clear evidence of helical folding and birefringence (**Fig. S1**).

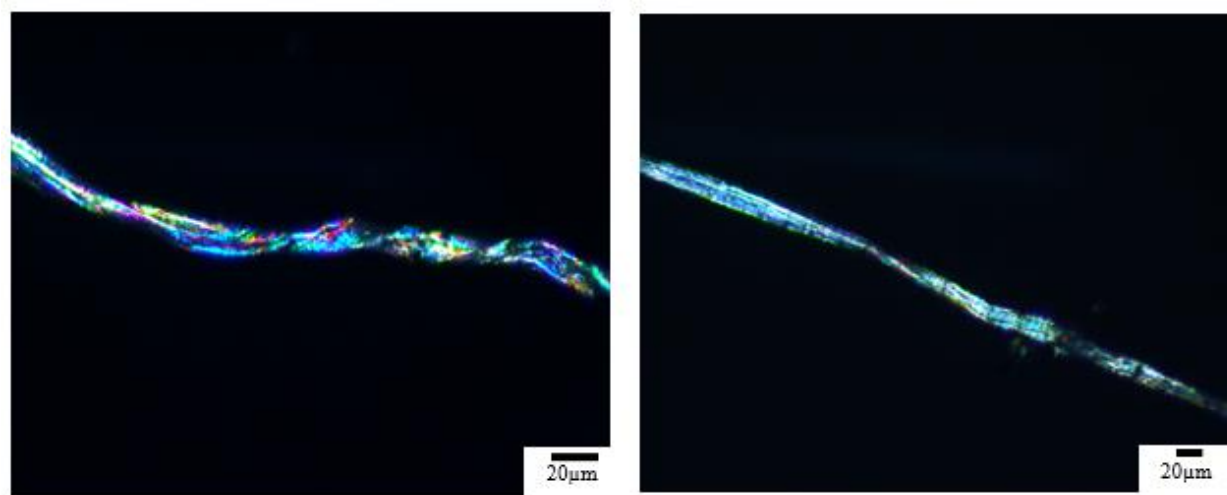

Fig. S1: POM images of PBVPLH (left) and PBVPDH (right).

## 2. Photo-luminescence spectra of *L*-histidine, *D*-histidine and PBVPH.

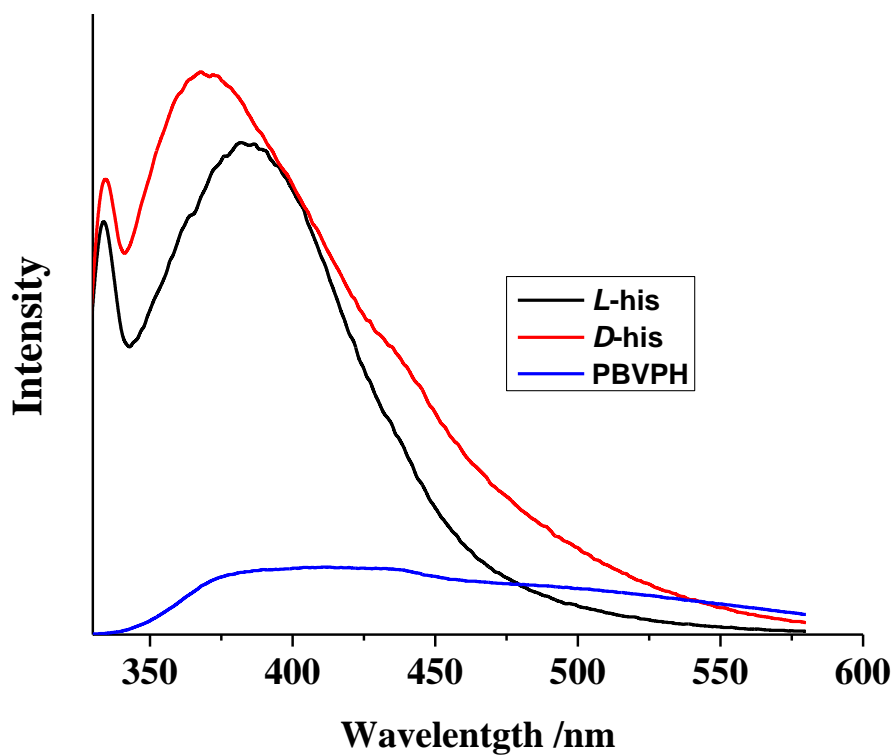

Fig. S2: PL spectra of PBVPH (blue), *L*-his (black) and *D*-his (red) excited at 330 nm.

## 3. $^1\text{H}$ -NMR spectra of PBVPH.

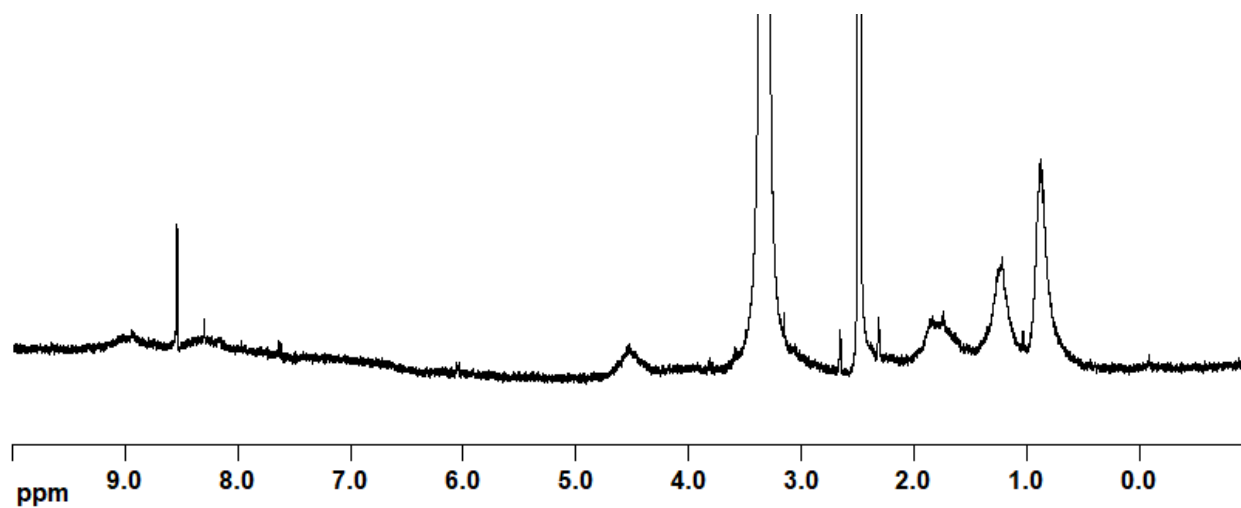

Fig. S3:  $^1\text{H}$ -NMR spectra of PBVPH (DMSO- $d_6$ , 28  $^{\circ}\text{C}$ ).
